# Supplementary material
Source: Springer Nature journal article supplement (https://www.springermedizin.de/resource/supplementary/12987_2006_149_MOESM3_ESM.pdf/9611420)

Measured closing pressure [cmH<sub>2</sub>O]

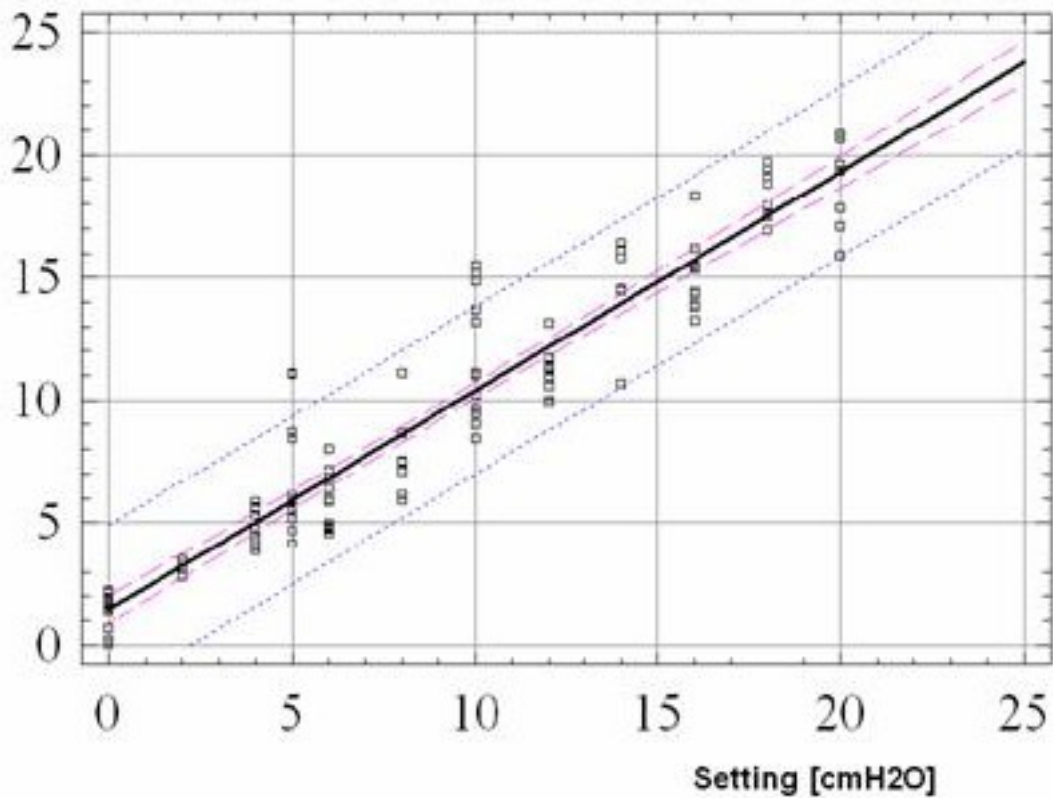

Supplement: MOESM3 [file 9611420]
